1 **Catching a resurgence: Increase in SARS-CoV-2 viral RNA identified**  
2 **in wastewater 48 hours before COVID-19 clinical tests and 96 hours**  
3 **before hospitalizations**

4 Patrick M. D'Aoust<sup>a</sup>, Tyson E. Graber<sup>b</sup>, Elisabeth Mercier<sup>c</sup>, Danika Montpetit<sup>c</sup>, Ilya Alexandrov<sup>d</sup>, Nafisa  
5 Neault<sup>b</sup>, Aiman Tariq Baig<sup>b</sup>, Janice Mayne<sup>e</sup>, Xu Zhang<sup>e</sup>, Tommy Alain<sup>b,e</sup>, Mark R. Servos<sup>h</sup>, Nivetha  
6 Srikanthan<sup>h</sup>, Malcolm MacKenzie<sup>d</sup>, Daniel Figeys<sup>e-g</sup>, Douglas Manuel<sup>i</sup>, Peter Jüni<sup>j</sup>, Alex E. MacKenzie<sup>b</sup>,  
7 Robert Delatolla<sup>a\*</sup>

8  
9 a: Department of Civil Engineering, University of Ottawa, Ottawa, Canada, K1N 6N5  
10 b: Children's Hospital of Eastern Ontario Research Institute, Ottawa, Canada, K1H 8L1  
11 c: Department of Chemical Engineering, University of Ottawa, Canada, K1N 6N5  
12 d: ActivSignal LLC., 27 Strathmore Rd Natick, MA, United States, 01760  
13 e: Department of Biochemistry, Microbiology and Immunology, University of Ottawa, Ottawa, Canada,  
14 K1H 8M5  
15 f: Department of Chemistry and Biomolecular Sciences, University of Ottawa, Ottawa, Canada, K1N 6N5  
16 g: Canadian Institute for Advanced Research, Toronto, Canada, M5G 1M1  
17 h: Department of Biology, University of Waterloo, Waterloo, Canada, N2L 3G1  
18 i: Department of Family Medicine, University of Ottawa, Ottawa, Canada, K1H 8M5  
19 j: Institute of Health Policy, Management and Evaluation, University of Toronto, Toronto, Canada, M5T  
20 3M6  
21  
22

23 Corresponding author:

24 **Dr. Robert Delatolla**

25 Work E-mail: [robert.delatolla@uOttawa.ca](mailto:robert.delatolla@uOttawa.ca)

## 26 **Abstract**

27           Curtailing the Spring 2020 COVID-19 surge required sweeping and stringent interventions by  
28 governments across the world. Wastewater-based COVID-19 epidemiology programs have been initiated  
29 in many countries to provide public health agencies with a complementary disease tracking metric and  
30 facile surveillance tool. However, their efficacy in prospectively capturing resurgence following a period of  
31 low prevalence is unclear. In this study, the SARS-CoV-2 viral signal was measured in primary clarified  
32 sludge harvested every two days at the City of Ottawa's water resource recovery facility during the  
33 summer of 2020, when clinical testing recorded daily percent positivity below 1%. In late July, increases  
34 of >400% in normalized SARS-CoV-2 RNA signal in wastewater were identified 48 hours prior to reported  
35 >300% increases in positive cases that were retrospectively attributed to community-acquired infections.  
36 During this resurgence period, SARS-CoV-2 RNA signal in wastewater preceded the reported >160%  
37 increase in community hospitalizations by approximately 96 hours. This study supports wastewater-based  
38 COVID-19 surveillance of populations in augmenting the efficacy of diagnostic testing, which can suffer  
39 from sampling biases or timely reporting as in the case of hospitalization census.

40 **Keywords:** COVID-19; wastewater-based epidemiology; SARS-CoV-2, virus, resurgence, wave

## 41 **1. Introduction**

42           The COVID-19 global pandemic has profound impacts on day-to-day life through sickness, death  
43 and also the economic and social effects of lockdowns, closures and curfews put in place by local  
44 governments to control and limit the community spread of the disease. COVID-19 surveillance  
45 approaches invoked by nations around the world include case ascertainment of individual patients and  
46 include nucleic acid-based tests, serological tests and contact tracing. The objective of this study is to  
47 investigate early identification of COVID-19 infection resurgence in Ottawa (Ontario, Canada), using  
48 SARS-CoV-2 viral RNA signal in primary sludge wastewater.

49           Wastewater-based epidemiology (WBE) is a potential surveillance tool to obtain a rapid measure  
50 of COVID-19 infection in the population at large. Fecal shedding of SARS-CoV-2 viral particles has been  
51 shown to occur before, during and after active COVID-19 infection, for periods ranging from a few days to  
52 several weeks (Chen et al., 2020; Cheung et al., 2020; Xing et al., 2020; Xu et al., 2020), with current  
53 literature suggesting that children may shed viral particles longer than adults (Li et al., 2020; Ma et al.,  
54 2020). Fecal shedding of SARS-CoV-2 viral particles in stool occurs in patients infected with COVID-19  
55 and appears to be independent of the presence of SARS-CoV-2 viral particles in the upper respiratory  
56 tract. As WBE initiatives rely on the fecally shed viral particles (Collivignarelli et al., 2020; Lodder and de  
57 Roda Husman, 2020), an understanding of the predictive ability of this epidemiological metric is  
58 necessary for public health units to appropriately action this tool (Hart and Halden, 2020; Hill et al., 2020;  
59 Thompson et al., 2020). In particular, studies to date that demonstrate the potential for WBE to identify  
60 the onset of community infection prior to clinical testing have largely been applied to identifying first wave  
61 of the disease in community (Kaplan et al., 2020; La Rosa et al., 2020; Medema et al., 2020; Nemudryi et  
62 al., 2020; Peccia et al., 2020; Sherchan et al., 2020; Vallejo et al., 2020; Wu et al., 2020). Due to limited  
63 clinical testing in many countries during the onset of COVID-19 and limited use of wastewater-based  
64 SARS-CoV-2 surveillance, it remains unclear whether WBE can have a role in identifying COVID-19  
65 resurgences. The objectives of this study are to establish a relationship between: i) increases in SARS-  
66 CoV-2 RNA signal in wastewater, ii) increases in the number of new COVID-19 positive patient cases in

67 the community, and iii) increases in the number of new hospitalizations of COVID-19 positive patients in  
68 the community.

## 69 **2. Materials and methods**

### 70 **2.1. Characteristics of the City of Ottawa's water resource recovery facility**

71 Primary clarified sludge samples were harvested from the City of Ottawa's Robert O. Pickard  
72 Environmental Centre, in Ottawa, ON, which services approximately 1.0M residents of the national capital  
73 region. The hydraulic residence time of the Ottawa sewershed ranges from 2 hours to 35 hours, with an  
74 average residence time of approximately 12 hours. The Ottawa water resource recovery facility (WRRF)  
75 has an average daily flow of 435,000 m<sup>3</sup> per day. The facility is comprised of preliminary treatment  
76 consisting of coarse and fine screening and grit chambers for the removal of larger particles. The primary  
77 treatment units consist of rectangular primary clarifiers and the secondary treatment is a conventional  
78 activated sludge system operating without nitrification. Finally, chlorination is used as a disinfection  
79 method followed by dechlorination prior to discharge to receiving waters.

### 80 **2.2. Sample collection, concentration, extraction and quantification**

81 24-hour composite samples of primary clarified sludge (PCS) were collected from the Ottawa  
82 WRRF at a frequency of every 2 days for a six-week period, from June 20<sup>th</sup>, 2020 until August 4<sup>th</sup>, 2020.  
83 Concentration of samples, extraction of nucleic acids and quantification of SARS-CoV-2 N1 and N2 gene  
84 regions were performed according to D'Aoust et al. (2020). It has been previously observed that  
85 normalization of SARS-CoV-2 viral copies with pepper mild mottle virus (copies SARS-CoV-2/copies  
86 PMMoV) was used to normalize viral SARS-CoV-2 signal for variations in wastewater chemico-physical  
87 characteristics, plant flows, wastewater solids organic/inorganic ratio and PCR amplification (D'Aoust et  
88 al., 2020). Evaluation of viral recovery efficiency was also performed as per D'Aoust et al. (2020); with the  
89 data in this study not being corrected for recovery efficiency. Dilution tests were periodically performed to  
90 determine if inhibition was present in the samples. The method's limit of detection for the N1 and N2 gene  
91 regions was determined by determining the concentration at which a detection rate of  $\geq 95\%$  (<5% false  
92 negatives) was obtained, as per the MIQE recommendations (Bustin et al., 2009). Additionally, samples  
93 were discarded if they did not meet the following requirements: 1) standard curves are linear ( $R^2 \geq 0.95$ ),  
94 2) the copies/well are found in the linear range of the standard curve, and 3) the primer efficiency was

95 between 90%-130%. Additionally, all samples were analyzed in triplicate and samples with values greater  
96 than 2 standard deviations away from the mean were discarded.

## 97 **2.3. COVID-19 epidemiological data**

### 98 **Clinical epidemiological data**

99 During the study period, there were two main methods of COVID-19 surveillance. The first  
100 method was to observe the daily number of new confirmed COVID-19 infections, determined via  
101 laboratory-confirmed SARS-CoV-2 tests using reverse transcriptase-quantitative polymerase chain  
102 reaction (RT-qPCR) that targeted the RNA-Dependent RNA polymerase for multiple genes. Tests were  
103 classified as positive for SARS-CoV-2 infection if at least one of any of the two gene “targets” were  
104 detected (Government of Ontario, 2020). There was a notable increase in COVID-19 testing in Ottawa  
105 during early June with an average daily testing increase from approximately 270 tests per day to  
106 approximately 800 tests per day. As a result of increased testing resources, testing was predominantly  
107 performed at dedicated community clinics, physician offices and in hospitals, retirement homes and long-  
108 term care facilities.

109 The second method used for COVID-19 surveillance was the daily hospital census counts,  
110 defined as the number of patients residing in Ottawa with confirmed COVID-19 infections at midnight to  
111 any of Ottawa five acute care hospitals that accepted COVID-19 patients. The average length of stay  
112 during the study period was 19.5 days, interquartile range 22 days.

113 Additional methods used for surveillance of COVID-19 infection is are the number of daily cases  
114 and test positivity. These metrics are commonly communicated to the public. COVID-19 test positivity is  
115 the proportion of positive COVID-19 cases as a percent of all individuals tested for COVID-19 on a  
116 specific date. Confirmed COVID-19 cases and positivity were examined using daily counts based on the  
117 date of the test reported for Ottawa residents and seven-day mid-point average.

## 118 **2.4. Statistical analysis**

119 In order to test for significance and for strength of correlation between SARS-CoV-2 RNA signal  
120 and epidemiological metrics, a student's t-test and Pearson's correlation analyses were performed, with a  
121  $p$ -value of 0.05 or lower signifying significance.

122 To evaluate if a lag existed between the appearance of increased SARS-CoV-2 RNA signal in  
123 wastewater and epidemiological metrics, time-step analyses were also performed where the correlations  
124 between viral RNA signal and epidemiological metrics were offset by a period of 1 to 7 days. The time-  
125 step analysis was performed across three discreet time-periods: i) pre-resurgence and resurgence,  
126 ending after the resurgence (June 21<sup>st</sup> to July 21<sup>st</sup>), ii) pre-resurgence and post-resurgence, extending to  
127 the end of the data set (June 21<sup>st</sup> to July 25<sup>th</sup>) and iii) full data period (June 21<sup>st</sup> to August 4<sup>th</sup>).

### 128 **3. Results, discussion and implications**

#### 129 **3.1. Trend and peak of wastewater SARS-CoV-2 RNA viral level and other** 130 **COVID-19 surveillance metrics**

131 All conventional COVID-19 surveillance measures increased during the study period from a low  
132 level at the beginning of the study. The number of daily cases and percent positive cases was highest on  
133 July 19, with a 326% relative increase from the preceding 7-day period. Meanwhile, current hospitalized  
134 patient cases were at their highest on July 31-Aug 2 with a 168% increase compared to the week of July  
135 13 (Figure 2 a-d).

136 PMMoV normalized SARS-CoV-2 viral copies, a metric outlined in an earlier publication (D'Aoust  
137 et al., 2020), normalizes SARS-CoV-2 viral copies by the number of copies of PMMoV in wastewater, and  
138 is effective due to the great temporal stability of PMMoV, as demonstrated in Figure 1, below.  
139 Additionally, dilution tests demonstrated that the sample PCR was not inhibited.

It is made available under a [CC-BY-NC-ND 4.0 International license](https://creativecommons.org/licenses/by-nc-nd/4.0/) .

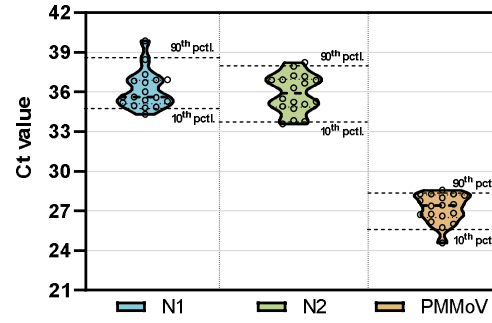

140

141 Figure 1: Ct values of the SARS-CoV-2 N1 and N2 gene regions, and the PMMoV normalization gene (1:10 dilution  
142 shown), outlining the greater stability of PMMoV, justifying its use as a normalization gene. The 10<sup>th</sup> and 90<sup>th</sup>  
143 percentile are displayed, along with the median (dotted line inside shapes).

144



145            Similarly to other epidemiological metrics, the PMMoV normalized viral signal in Ottawa's  
146 wastewater was also shown to be low at the beginning of the study period through to the week of July 13  
147 with both N1 and N2 regions below  $1.00 \times 10^{-4}$  copies/copies PMMoV. There was a 450% relative increase  
148 ( $p < 0.05$ ) in N1 and 440% increase ( $p < 0.05$ ) in N2 viral regions on July 17 to 19 compared to July 13 to  
149 15. The absolute increase of  $2.03 \times 10^{-4}$  and  $3.01 \times 10^{-4}$  copies/copies PMMoV was reported during this  
150 period of increase for N1 and N2 gene regions, respectively (Figure 2e). The wastewater-based  
151 epidemiological metric in this study was not corrected for recovery percentages.

It is made available under a [CC-BY-NC-ND 4.0 International license](https://creativecommons.org/licenses/by-nc-nd/4.0/).

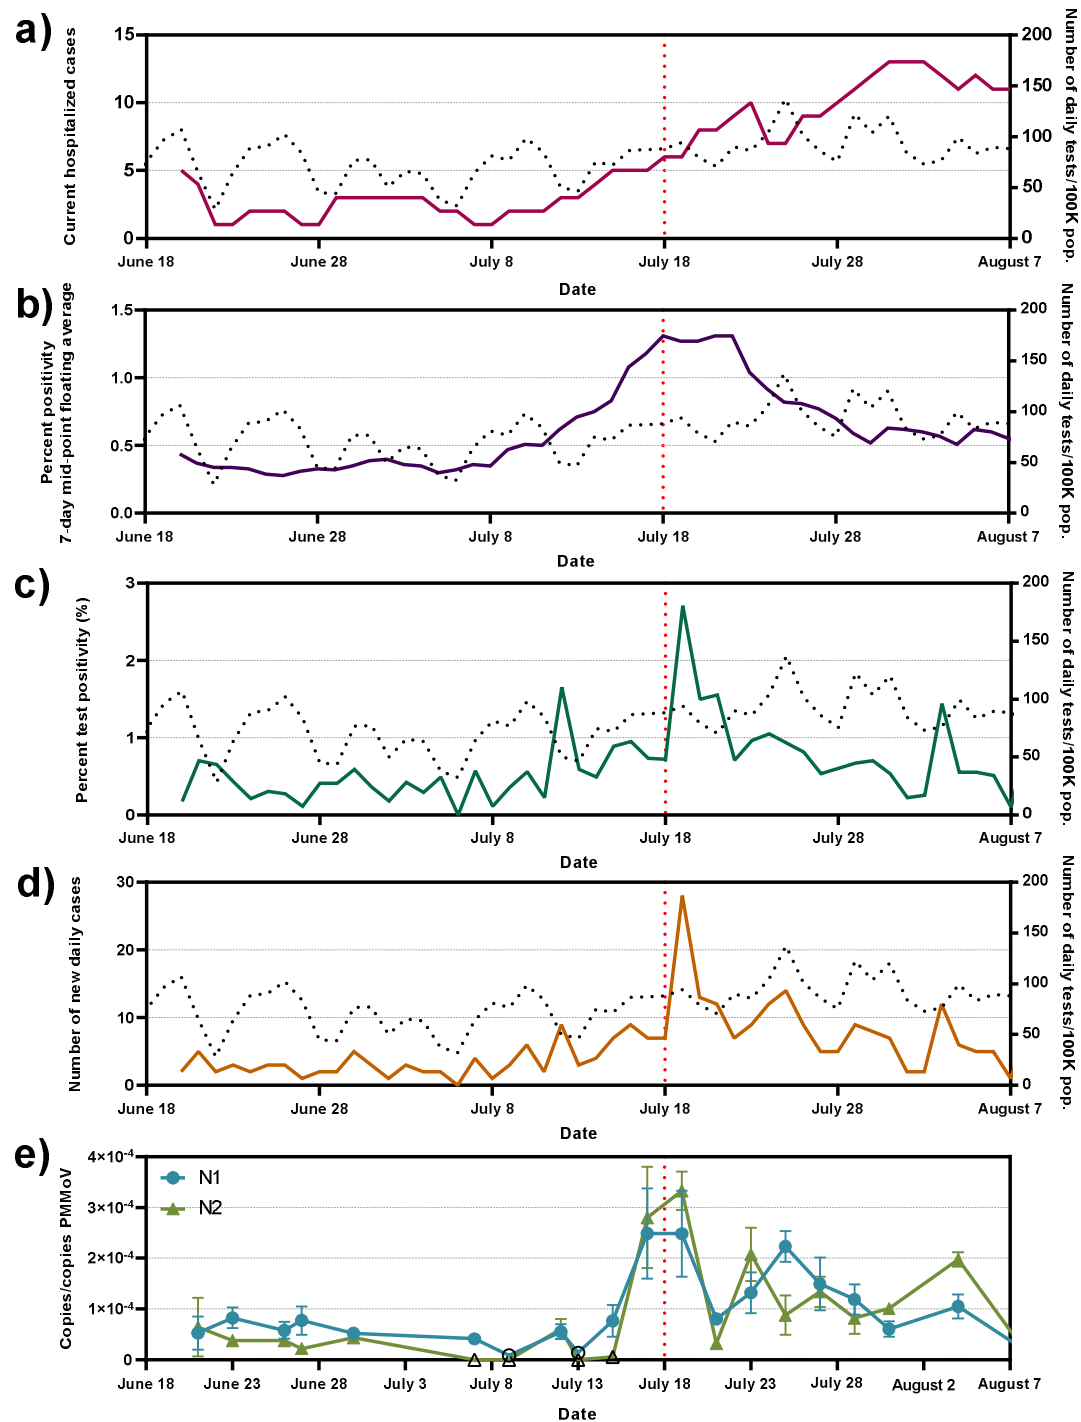

Figure 2: Epidemiological metrics and SARS-CoV-2 viral concentrations over the study period; a) COVID-19-caused hospitalizations, b) percent test positivity (7-day mid-point floating average), c) percent test positivity and d) number of new daily cases, along with e) wastewater SARS-CoV-2 N1 and N2 gene copies/PMMoV gene copies. Open data points signify points which were below the limit of quantification.



### 154 **3.2. Correlation between surveillance metrics**

155 Positive correlations were observed (Figure 2 c, d and e) between the normalized viral RNA  
156 signal and both the number of new daily positive COVID-19 cases (N1:  $R = 0.673$ ,  $p < 0.001$ ; N2:  $R =$   
157  $0.648$ ,  $p < 0.001$ ) and clinical testing percent positivity (N1:  $R = 0.468$ ,  $p < 0.001$ ; N2:  $R = 0.404$ ,  $p < 0.001$ ).  
158 These findings are in agreement with reported observations from previous studies (D'Aoust et al., 2020;  
159 Nemudryi et al., 2020; Peccia et al., 2020). This study, as opposed to an earlier study in the same region  
160 (D'Aoust et al., 2020), demonstrates that strong correlations do in fact exist between viral RNA signal and  
161 the epidemiological metric of clinical daily new COVID-19 cases, as supported by several other studies  
162 (Hart and Halden, 2020; Michael-Kordatou et al., 2020; Trottier et al., 2020; Wu et al., 2020). The  
163 moderate correlations between viral RNA signal and clinical daily new COVID-19 cases in previous work  
164 was largely attributed to inadequate resources to achieve a developed clinical testing framework early in  
165 the pandemic (lower daily # of tests). In this study, a strong testing regiment was deployed in Ottawa and  
166 hence produced a more reliable daily new COVID-19 cases metric across this study period. A moderately  
167 weak positive correlation exists between N1 and N2 SARS-CoV-2 PMMoV-normalized RNA signal and  
168 COVID-19-caused hospitalizations ( $R = 0.347$ ,  $p < 0.001$  and  $R = 0.464$ ,  $p < 0.001$  for N1 and N2,  
169 respectively; Figure 2 a and e).

### 170 **3.3. Temporal association between surveillance metrics**

171 A visual comparison of clinical testing percent positivity and the number of new daily positive  
172 COVID-19 cases compared to the PMMoV-normalized RNA signal shows that the viral RNA signal  
173 predates both the clinical testing percent positivity and new daily positive COVID-19 cases  
174 epidemiological data. A times-step correlation shows the strongest correlation for a two-day step between  
175 SARS-CoV-2 viral RNA signal and both the number of new daily positive COVID-19 cases and the clinical  
176 testing percent positivity (N1:  $R = 0.703$ ,  $p < 0.001$ ; N2:  $R = 0.721$ ,  $p < 0.001$  N1:  $R = 0.703$ ,  $p < 0.001$ ; N2:  $R$   
177  $= 0.714$ ,  $p < 0.001$ ) (Table 1). The strong correlation for hospitalized cases is observed after a time-step of  
178 four days (N1:  $R = 0.741$ ,  $p < 0.001$ ; N2:  $R = 0.767$ ,  $p < 0.001$ ). The precedence of viral RNA signal vs.  
179 other epidemiological metrics has been reported recently by other earlier studies (Chavarria-Miró et al.,  
180 2020; Kumar et al., 2020; Peccia et al., 2020).

It is made available under a [CC-BY-NC-ND 4.0 International license](https://creativecommons.org/licenses/by-nc-nd/4.0/) .

181 Table 1: Time-step analyses of correlations (Pearson's R) between normalized SARS-CoV-2 viral RNA signal  
 182 (copies/copies PMMoV) and 7-day rolling average percent positivity, test percent positivity and daily new cases  
 183 epidemiological metrics.

|                   | Daily offset | Hospitalized cases |       | 7-day rolling average test percent positivity |        | Test percent positivity |        | Daily new cases |       |
|-------------------|--------------|--------------------|-------|-----------------------------------------------|--------|-------------------------|--------|-----------------|-------|
|                   |              | N1                 | N2    | N1                                            | N2     | N1                      | N2     | N1              | N2    |
| June 21 - July 21 | 0            | 0.488              | 0.502 | 0.675                                         | 0.662  | 0.551                   | 0.635  | 0.680           | 0.754 |
|                   | 1            | 0.599              | 0.578 | 0.662                                         | 0.647  | 0.634                   | 0.723  | 0.642           | 0.692 |
|                   | 2            | 0.532              | 0.487 | 0.666                                         | 0.679  | 0.853                   | 0.821  | 0.810           | 0.765 |
|                   | 3            | 0.747              | 0.754 | 0.556                                         | 0.593  | 0.191                   | 0.208  | 0.354           | 0.310 |
|                   | 4            | 0.741              | 0.767 | 0.415                                         | 0.457  | 0.338                   | 0.332  | 0.265           | 0.237 |
|                   | 5            | 0.512              | 0.487 | 0.301                                         | 0.341  | 0.144                   | 0.140  | 0.375           | 0.405 |
|                   | 6            | 0.534              | 0.490 | 0.104                                         | 0.167  | -0.031                  | 0.023  | 0.107           | 0.190 |
|                   | 7            | 0.375              | 0.361 | -0.012                                        | 0.077  | -0.040                  | 0.070  | 0.078           | 0.178 |
| June 21 - July 25 | 0            | 0.539              | 0.551 | 0.659                                         | 0.688  | 0.505                   | 0.612  | 0.707           | 0.712 |
|                   | 1            | 0.689              | 0.562 | 0.631                                         | 0.653  | 0.637                   | 0.747  | 0.662           | 0.709 |
|                   | 2            | 0.634              | 0.489 | 0.623                                         | 0.667  | 0.724                   | 0.794  | 0.699           | 0.783 |
|                   | 3            | 0.786              | 0.695 | 0.488                                         | 0.576  | 0.128                   | 0.203  | 0.277           | 0.346 |
|                   | 4            | 0.790              | 0.690 | 0.324                                         | 0.437  | 0.264                   | 0.277  | 0.245           | 0.192 |
|                   | 5            | 0.632              | 0.483 | 0.188                                         | 0.303  | 0.114                   | 0.108  | 0.378           | 0.354 |
|                   | 6            | 0.645              | 0.482 | 0.038                                         | 0.118  | -0.073                  | 0.008  | 0.102           | 0.202 |
|                   | 7            | 0.531              | 0.408 | -0.074                                        | 0.015  | -0.157                  | 0.041  | -0.032          | 0.163 |
| Whole data set    | 0            | 0.347              | 0.470 | 0.644                                         | 0.626  | 0.469                   | 0.527  | 0.673           | 0.648 |
|                   | 1            | 0.453              | 0.484 | 0.606                                         | 0.602  | 0.634                   | 0.668  | 0.654           | 0.634 |
|                   | 2            | 0.429              | 0.424 | 0.593                                         | 0.603  | 0.703                   | 0.714  | 0.703           | 0.721 |
|                   | 3            | 0.556              | 0.565 | 0.448                                         | 0.491  | 0.027                   | 0.081  | 0.182           | 0.375 |
|                   | 4            | 0.603              | 0.586 | 0.307                                         | 0.360  | 0.233                   | 0.278  | 0.223           | 0.158 |
|                   | 5            | 0.497              | 0.477 | 0.165                                         | 0.234  | 0.079                   | -0.034 | 0.306           | 0.206 |
|                   | 6            | 0.546              | 0.500 | 0.020                                         | 0.064  | -0.091                  | 0.021  | 0.074           | 0.195 |
|                   | 7            | 0.468              | 0.443 | -0.080                                        | -0.119 | -0.074                  | 0.005  | -0.025          | 0.178 |

184

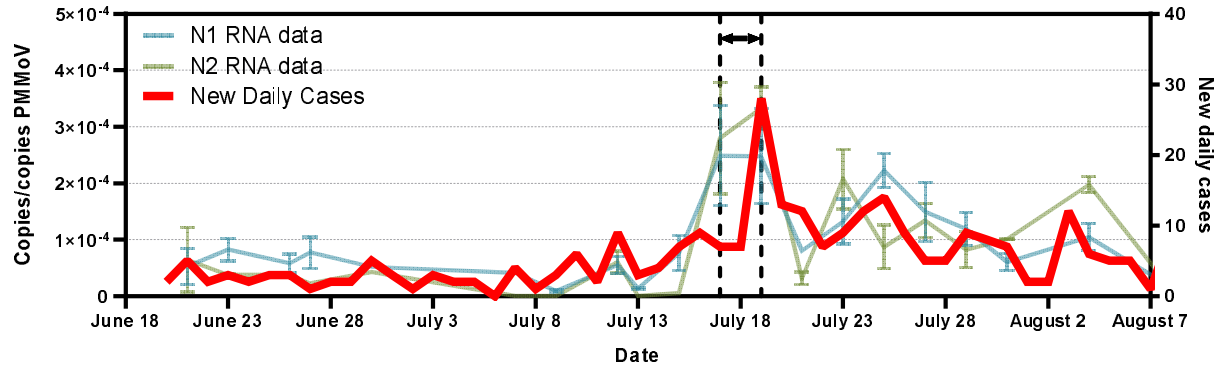

Figure 3: Figure of the new daily cases epidemiological metric (in red) with SARS-CoV-2 viral RNA signal in Ottawa's primary clarified sludge samples, with the precedence of SARS-COV-2 viral signal in wastewater clearly outlined.

185 This observation is supported by, and confirms earlier studies (Chavarria-Miró et al., 2020; Kumar  
186 et al., 2020; Peccia et al., 2020). Recent studies proposed that viral SARS-CoV-2 RNA data may in fact  
187 precede hospital admissions by 1 to 4 days in primary sludge (Figure 3) (Peccia et al., 2020), and 6-14  
188 days in raw wastewater (Kumar et al., 2020). This could signify that hospitalizations may begin peaking  
189 four days after an increased viral RNA signal, with the caveat that hospitalizations rates may be  
190 significantly higher when viral RNA signal is the result from shedding of an at-risk population group  
191 (young infants, elderly, immunocompromised, etc.). In addition, the RNA signal post-resurgence indicates  
192 that the resurgence events in viral RNA signal serves to weaken the correlation of subsequent peaks with  
193 clinical testing metrics. It is hypothesized that early and later infections and overlapping shedding events  
194 of duration and intensity convolute peaks within a period of time following the initial new peaks/surges in  
195 COVID-19 infections. Nonetheless, the RNA epidemiological metric of copies/copies PMMoV may  
196 become extremely valuable to public health units in their preparation for the next COVID-19 wave.

## 197 **4. Conclusions**

198 This study demonstrates that due to the general stability of SARS-CoV-2 RNA measurements in  
199 PCS, this fraction of wastewater can reliably be utilized to predict rapid increases or resurgences in  
200 COVID-19 cases in the community at large (Alpaslan-Kocamemi et al., 2020; D'Aoust et al., 2020; Peccia  
201 et al., 2020), and the results strongly suggests that PCS can be utilized as part of sentinel-type  
202 wastewater based epidemiology endeavors at WRRFs.

203 Advantages of this approach include: i) the analyses in water resource recovery facilities are  
204 high-enrollment surveys, which capture a majority of the urban population, regardless of individual's  
205 reluctance to get tested clinically; ii) tests are anonymous and do not pose ethical challenges as opposed  
206 to mass clinical testing or targeted sewershed monitoring efforts; iii) data can be used as a confirmation to  
207 clinical tests, increases the effectiveness of local public health units and data remains independent of  
208 official testing strategies or media sentiment, and iv) provides an exit strategy/path forward for public  
209 health units as something to eventually transition to once immunization is available, to cut down on  
210 clinical testing costs, while maintaining broad surveillance capabilities. However, limitations to this WBE  
211 approach includes the following: i) data obtained only gives high-altitude view of the situation in the  
212 community, and it is currently not possible to correlate this data to an actual number of cases in the  
213 community; ii) testing protocols must be optimized and retain sensitivity at very-low levels of disease  
214 incidence to remain relevant; iii) widespread adoption of WBE requires scale-up of public health units'  
215 current capabilities and/or partnership with private laboratories or research institutions, and iv) increases  
216 in resolution (more localized, upstream of water resource recovery facilities, for example) of tests in  
217 watersheds may lead to ethical questions for public health unit if it wishes to act upon the data, due to the  
218 potential risk for identifying or singling out small subgroups of a population. It is noted however that these  
219 issues are not dissimilar to other ethical issues currently existing with other COVID-19 public health  
220 endeavors, such as COVID-19 potential exposure notification smartphone applications.

## 221 **Declaration of competing interests**

222           The authors declare that no known competing financial interests or personal relationships could  
223 appear to influence the work reported in this manuscript.

## 224 **Acknowledgements**

225           The authors wish to acknowledge the help and assistance of the University of Ottawa, the Ottawa  
226 Hospital, the Children's Hospital of Eastern Ontario, the Children's Hospital of Eastern Ontario's Research  
227 Institute, the City of Ottawa, Ottawa Public Health, Public Health Ontario and all their employees involved  
228 in the project during this study. Their time, facilities, resources and thoughts provided throughout the  
229 study helped the authors greatly. The authors also wish to specifically outline the assistance of Dr. Monir  
230 Taha at Ottawa Public Health.

## 231 **Funding**

232           This research was supported by a CHEO (Children's Hospital of Eastern Ontario) CHAMO  
233 (Children's Hospital Academic Medical Organization) grant, awarded to Dr. Alex E. MacKenzie.



## 234 **5. References**

- 235 Alpaslan-Kocamemi, B., Kurt, H., Sait, A., Sarac, F., Saatci, A.M., Pakdemirli, B., 2020. SARS-CoV-2  
236 detection in Istanbul wastewater treatment plant sludges. medRxiv 2020.05.12.20099358.  
237 <https://doi.org/10.1101/2020.05.12.20099358>
- 238 Bustin, S.A., Benes, V., Garson, J.A., Hellems, J., Huggett, J., Kubista, M., Mueller, R., Nolan, T.,  
239 Pfaffl, M.W., Shipley, G.L., Vandesompele, J., Wittwer, C.T., 2009. The MIQE guidelines: Minimum  
240 information for publication of quantitative real-time PCR experiments. Clin. Chem. 55, 611–622.  
241 <https://doi.org/10.1373/clinchem.2008.112797>
- 242 CDC, 2020. Real-Time RT-PCR diagnostic panel for emergency use only. CDC EUA.
- 243 Chavarria-Miró, G., Anfruns-Estrada, E., Guix, S., Paraira, M., Galofré, B., Sánchez, G., Pintó, R.,  
244 Bosch, A., 2020. Sentinel surveillance of SARS-CoV-2 in wastewater anticipates the occurrence of  
245 COVID-19 cases. medRxiv 2020.06.13.20129627. <https://doi.org/10.1101/2020.06.13.20129627>
- 246 Chen, Y., Chen, L., Deng, Q., Zhang, G., Wu, K., Ni, L., Yang, Y., Liu, B., Wang, W., Wei, C., Yang, J.,  
247 Ye, G., Cheng, Z., 2020. The presence of SARS-CoV-2 RNA in the feces of COVID-19 patients. J.  
248 Med. Virol. 92, 833–840. <https://doi.org/10.1002/jmv.25825>
- 249 Cheung, K.S., Hung, I.F.N., Chan, P.P.Y., Lung, K.C., Tso, E., Liu, R., Ng, Y.Y., Chu, M.Y., Chung,  
250 T.W.H., Tam, A.R., Yip, C.C.Y., Leung, K.-H., Fung, A.Y.-F., Zhang, R.R., Lin, Y., Cheng, H.M.,  
251 Zhang, A.J.X., To, K.K.W., Chan, K.-H., Yuen, K.-Y., Leung, W.K., 2020. Gastrointestinal  
252 Manifestations of SARS-CoV-2 Infection and Virus Load in Fecal Samples From a Hong Kong  
253 Cohort: Systematic Review and Meta-analysis. Gastroenterology 81–95.  
254 <https://doi.org/10.1053/j.gastro.2020.03.065>
- 255 Collivignarelli, M.C., Collivignarelli, C., Carnevale Miino, M., Abbà, A., Pedrazzani, R., Bertanza, G., 2020.  
256 SARS-CoV-2 in sewer systems and connected facilities. Process Saf. Environ. Prot. 143, 196–203.  
257 <https://doi.org/10.1016/j.psep.2020.06.049>

- 258 D'Aoust, P.M., Mercier, É., Montpetit, D., Jia, J., Alexandrov, I., Neault, N., Baig, A.T., Mayne, J., Zhang,  
259 X., Alain, T., Langlois, M.-A., Servos, M.R., MacKenzie, M., Figeys, D., MacKenzie, A.E., Graber,  
260 T.E., Delatolla, R., 2020. Quantitative analysis of SARS-CoV-2 RNA from wastewater solids in  
261 communities with low COVID-19 incidence and prevalence. *Water Res.* 116560.  
262 <https://doi.org/10.1016/j.watres.2020.116560>
- 263 Government of Ontario, 2020. Case definition for coronavirus disease 2019 (COVID-19).
- 264 Hart, O.E., Halden, R.U., 2020. Computational analysis of SARS-CoV-2/COVID-19 surveillance by  
265 wastewater-based epidemiology locally and globally: Feasibility, economy, opportunities and  
266 challenges. *Sci. Total Environ.* 730, 138875. <https://doi.org/10.1016/j.scitotenv.2020.138875>
- 267 Hill, K., Zamyadi, A., Deere, D., Vanrolleghem, P.A., Crosbie, N.D., 2020. SARS-CoV-2 known and  
268 unknowns, implications for the water sector and wastewater-based epidemiology to support national  
269 responses worldwide: early review of global experiences with the COVID-19 pandemic. *Water Qual.*  
270 *Res. J.* 1–11. <https://doi.org/10.2166/wqrj.2020.100>
- 271 Kaplan, E.H., Wang, D., Wang, M., Malik, A.A., Zulli, A., Peccia, J.H., 2020. Aligning SARS-CoV-2  
272 Indicators via an epidemic model: Application to hospital admissions and RNA detection in sewage  
273 sludge. *medRxiv* 2020.06.27.20141739. <https://doi.org/10.1101/2020.06.27.20141739>
- 274 Kumar, M., Patel, A.K., Shah, A. V., Raval, J., Rajpara, N., Joshi, M., Joshi, C.G., 2020. First proof of the  
275 capability of wastewater surveillance for COVID-19 in India through detection of genetic material of  
276 SARS-CoV-2. *Sci. Total Environ.* 709, 141326. <https://doi.org/10.1016/j.scitotenv.2020.141326>
- 277 La Rosa, G., Iaconelli, M., Mancini, P., Bonanno Ferraro, G., Veneri, C., Bonadonna, L., Lucentini, L.,  
278 Suffredini, E., 2020. First detection of SARS-CoV-2 in untreated wastewaters in Italy. *Sci. Total*  
279 *Environ.* 736, 139652. <https://doi.org/10.1016/j.scitotenv.2020.139652>
- 280 Lee, H.W., Lee, H.M., Yoon, S.R., Kim, S.H., Ha, J.H., 2018. Pretreatment with propidium  
281 monoazide/sodium lauroyl sarcosinate improves discrimination of infectious waterborne virus by RT-  
282 qPCR combined with magnetic separation. *Environ. Pollut.* 233, 306–314.

- 283 <https://doi.org/10.1016/j.envpol.2017.10.081>
- 284 Li, X., Xu, W., Dozier, M., He, Y., Kirolos, A., Theodoratou, E., 2020. The role of children in transmission  
285 of SARS-CoV-2: A rapid review. *J. Glob. Health* 10, 1–10. <https://doi.org/10.7189/JOGH.10.011101>
- 286 Lodder, W., de Roda Husman, A.M., 2020. SARS-CoV-2 in wastewater: potential health risk, but also  
287 data source. *Lancet Gastroenterol. Hepatol.* 5, 533–534. [https://doi.org/10.1016/S2468-  
288 1253\(20\)30087-X](https://doi.org/10.1016/S2468-1253(20)30087-X)
- 289 Ma, X., Su, L., Zhang, Y., Zhang, X., Gai, Z., Zhang, Z., 2020. Do children need a longer time to shed  
290 SARS-CoV-2 in stool than adults? *J. Microbiol. Immunol. Infect.* 53, 373–376.  
291 <https://doi.org/10.1016/j.jmii.2020.03.010>
- 292 Medema, G., Heijnen, L., Elsinga, G., Italiaander, R., Brouwer, A., 2020. Presence of SARS-Coronavirus-  
293 2 RNA in sewage and correlation with reported COVID-19 prevalence in the early stage of the  
294 epidemic in the Netherlands. *Environ. Sci. Technol. Lett.* <https://doi.org/10.1021/acs.estlett.0c00357>
- 295 Michael-Kordatou, I., Karaolia, P., Fatta-Kassinos, D., 2020. Sewage analysis as a tool for the COVID-19  
296 pandemic response and management: the urgent need for optimised protocols for SARS-CoV-2  
297 detection and quantification. *J. Environ. Chem. Eng.* 8, 104306.  
298 <https://doi.org/10.1016/j.jece.2020.104306>
- 299 Nemudryi, A., Nemudraia, A., Wiegand, T., Surya, K., Buyukyoruk, M., Vanderwood, K., Wilkinson, R.,  
300 Wiedenheft, B., 2020. Temporal Detection and Phylogenetic Assessment of SARS-CoV-2 in  
301 Municipal Wastewater. *Cell Reports Med.* 1, 100098. <https://doi.org/10.2139/ssrn.3664367>
- 302 Peccia, J., Zulli, A., Brackney, D.E., Grubaugh, N.D., Kaplan, E.H., Casanovas-Massana, A., Ko, A.I.,  
303 Malik, A.A., Wang, D., Wang, M., Warren, J.L., Weinberger, D.M., Arnold, W., Omer, S.B., 2020.  
304 Measurement of SARS-CoV-2 RNA in wastewater tracks community infection dynamics. *Nat.*  
305 *Biotechnol.* <https://doi.org/10.1038/s41587-020-0684-z>
- 306 Sherchan, S.P., Shahin, S., Ward, L.M., Tandukar, S., Aw, T.G., Schmitz, B., Ahmed, W., Kitajima, M.,

- 307 2020. First detection of SARS-CoV-2 RNA in wastewater in North America: A study in Louisiana,  
308 USA. *Sci. Total Environ.* 743, 140621. <https://doi.org/10.1016/j.scitotenv.2020.140621>
- 309 Thompson, J.R., Nancharaiah, Y. V., Gu, X., Lee, W.L., Rajal, V.B., Haines, M.B., Girones, R., Ng, L.C.,  
310 Alm, E.J., Wuertz, S., 2020. Making waves: Wastewater surveillance of SARS-CoV-2 for population-  
311 based health management. *Water Res.* 184. <https://doi.org/10.1016/j.watres.2020.116181>
- 312 Trottier, J., Darques, R., Ait Mouheb, N., Partiot, E., Bakhache, W., Deffieu, M.S., Gaudin, R., 2020. Post-  
313 lockdown detection of SARS-CoV-2 RNA in the wastewater of Montpellier, France. *One Heal.* 10, 0–  
314 3. <https://doi.org/10.1016/j.onehlt.2020.100157>
- 315 Vallejo, J., Rumbo-Feal, S., Conde, K., López-Oriona, Á., Tarrío, J., Reif, R., Ladra, S., Rodiño-Janeiro,  
316 B., Nasser, M., Cid, A., Veiga, M., Acevedo, A., Lamora, C., Bou, G., Cao, R., Poza, M., 2020.  
317 Highly predictive regression model of active cases of COVID-19 in a population by screening  
318 wastewater viral load 1–36. <https://doi.org/10.1101/2020.07.02.20144865>
- 319 Wu, F., Zhang, J., Xiao, A., Gu, X., Lee, W.L., Armas, F., Kauffman, K., Hanage, W., Matus, M., Ghaeli,  
320 N., Endo, N., Duvallet, C., Poyet, M., Moniz, K., Washburne, A.D., Erickson, T.B., Chai, P.R.,  
321 Thompson, J., Alm, E.J., 2020. SARS-CoV-2 titers in wastewater are higher than expected from  
322 clinically confirmed cases. *mSystems* 5, 2020.04.05.20051540.  
323 <https://doi.org/10.1128/mSystems.00614-20>
- 324 Xing, Y.H., Ni, W., Wu, Q., Li, W.J., Li, G.J., Wang, W. Di, Tong, J.N., Song, X.F., Wing-Kin Wong, G.,  
325 Xing, Q.S., 2020. Prolonged viral shedding in feces of pediatric patients with coronavirus disease  
326 2019. *J. Microbiol. Immunol. Infect.* 53, 473–480. <https://doi.org/10.1016/j.jmii.2020.03.021>
- 327 Xu, Y., Li, X., Zhu, B., Liang, H., Fang, C., Gong, Y., Guo, Q., Sun, X., Zhao, D., Shen, J., Zhang, H., Liu,  
328 H., Xia, H., Tang, J., Zhang, K., Gong, S., 2020. Characteristics of pediatric SARS-CoV-2 infection  
329 and potential evidence for persistent fecal viral shedding. *Nat. Med.* 26, 502–505.  
330 <https://doi.org/10.1038/s41591-020-0817-4>

331



## 333 6. Supplemental Material

334 Supplementary Table 1: List of PCR primer and probe sets utilized in this study.

| <b>Primer/probe &amp; supplier</b>       | <b>Sequence</b>                                             | <b>Reference</b>      |
|------------------------------------------|-------------------------------------------------------------|-----------------------|
| <i>2019-nCoV_N1 forward primer (IDT)</i> | GAC CCC AAA ATC AGC GAA AT                                  | (CDC, 2020)           |
| <i>2019-nCoV_N1 reverse primer (IDT)</i> | TCT GGT TAC TGC CAG TTG AAT CTG                             | (CDC, 2020)           |
| <i>2019-nCoV_N1 probe (IDT)</i>          | 6-FAM-ACC CCG CAT/ZEN/ TAC GTT TGG TGG ACC-IOWA<br>BLACK FQ | (CDC, 2020)           |
| <i>2019-nCoV_N2 forward primer (IDT)</i> | TTA CAA ACA TTG GCC GCA AA                                  | (CDC, 2020)           |
| <i>2019-nCoV_N2 reverse primer (IDT)</i> | GCG CGA CAT TCC GAA GAA                                     | (CDC, 2020)           |
| <i>2019-nCoV_N2 probe (IDT)</i>          | 6-FAM-ACA ATT TGC/ZEN/CCC CAG CGC TTC AG-IOWA BLACK<br>FQ   | (CDC, 2020)           |
| <i>PMMoV forward primer (ABI)</i>        | GAG TGG TTT GAC CTT AAC GTT GA                              | (Lee et al.,<br>2018) |
| <i>PMMoV reverse primer (ABI)</i>        | TTG TCG GTT GCA ATG CAA GT                                  | (Lee et al.,<br>2018) |
| <i>PMMoV probe (ABI)</i>                 | 6-FAM-CCT ACC GAA GCA AAT G-MGB                             | (Lee et al.,<br>2018) |

335
